# Supplementary material for: Utility of Leptomeningeal Collaterals in Predicting Intracranial Atherosclerosis-Related Large Vessel Occlusion in Endovascular Treatment
Source: PubMed Central journal article supplement (PMC7564225; doi:10.3390/jcm9092784), 2020-08-28
Supplement: jcm-09-02784-s001.pdf [file jcm-09-02784-s001.pdf]

## SUPPLEMENTARY MATERIAL

**Table S1. Multivariable analyses for the association with intracranial atherosclerosis-related large vessel occlusion**

|                                    | Model 1                |                 | Model 2                |                 | Model 3                |                 | Model 4                |                 |
|------------------------------------|------------------------|-----------------|------------------------|-----------------|------------------------|-----------------|------------------------|-----------------|
|                                    | Odds ratio<br>(95% CI) | <i>P</i> -value | Odds ratio<br>(95% CI) | <i>P</i> -value | Odds ratio<br>(95% CI) | <i>P</i> -value | Odds ratio<br>(95% CI) | <i>P</i> -value |
| Current smoking                    | 3.08 (1.32–7.18)       | 0.010           | 3.08 (1.32–7.18)       | 0.009           | 2.82 (1.24–6.43)       | 0.014           | 3.06 (1.31–7.14)       | 0.010           |
| Atrial fibrillation                | 0.45 (0.20–1.01)       | 0.053           | 0.44 (0.20–0.99)       | 0.048           | 0.43 (0.19–0.96)       | 0.040           | 0.44 (0.20–0.99)       | 0.047           |
| Initial NIHSS score                | 0.93 (0.86–1.01)       | 0.069           | 0.93 (0.86–1.00)       | 0.061           | 0.92 (0.85–0.99)       | 0.031           | 0.93 (0.86–1.00)       | 0.055           |
| Leptomeningeal collaterals         |                        |                 |                        |                 |                        |                 |                        |                 |
| Three assessment methods           |                        |                 |                        |                 |                        |                 |                        |                 |
| Method 1 ( <i>Tan</i> )            |                        |                 |                        |                 |                        |                 |                        |                 |
| 0%                                 | Reference              |                 |                        |                 |                        |                 |                        |                 |
| > 0% but ≤ 50%                     | 1.40 (0.14–13.9)       | 0.774           |                        |                 |                        |                 |                        |                 |
| > 50% but < 100%                   | 1.58 (0.17–14.3)       | 0.685           |                        |                 |                        |                 |                        |                 |
| 100%                               | 4.94 (0.55–44.5)       | 0.155           |                        |                 |                        |                 |                        |                 |
| Method 2 ( <i>shortened Maas</i> ) |                        |                 |                        |                 |                        |                 |                        |                 |
| 0%                                 |                        |                 | Reference              |                 |                        |                 |                        |                 |
| > 0% but < 100%                    |                        |                 | 1.51 (0.17–13.2)       | 0.708           |                        |                 |                        |                 |
| 100%                               |                        |                 | 4.91 (0.54–44.3)       | 0.157           |                        |                 |                        |                 |
| Method 3 ( <i>modified Tan</i> )   |                        |                 |                        |                 |                        |                 |                        |                 |
| ≤ 50%                              |                        |                 |                        |                 | Reference              |                 |                        |                 |
| > 50%                              |                        |                 |                        |                 | 1.99 (0.74–5.31)       | 0.170           |                        |                 |
| New method                         |                        |                 |                        |                 |                        |                 |                        |                 |
| Incomplete (< 100%)                |                        |                 |                        |                 |                        |                 | Reference              |                 |
| Complete (100%)                    |                        |                 |                        |                 |                        |                 | 3.32 (1.52–7.26)       | 0.003           |

CI, confidence interval; NIHSS, National Institutes of Health Stroke Scale.
